# Supplementary material for: Genetic Dissection of CRISPR-Cas9 Mediated Inheritance of Independently Targeted Alleles in Tobacco α-1,3-Fucosyltransferase 1 and β-1,2-Xylosyltransferase 1 Loci
Source: MDPI journal article supplement (doi:10.3390/ijms23052450), 2022-02-23
Supplement: s1 [file s1]

**Table S1.** gRNA properties used in the experiment.

| Target gene | Vector     | sgRNA      |            |                    |            |           |
|-------------|------------|------------|------------|--------------------|------------|-----------|
|             |            | name       | GC content | Out-of-frame score | Mismatches | Direction |
| NbFucT1     | pGenovo111 | sgRNAFucT1 | 30.00%     | 59.90%             | 0          | -         |
| NbXylT1     |            | sgRNAXylT1 | 60.00%     | 60.50%             | 0          | -         |
