# Supplementary material for: Genetic Dissection of CRISPR-Cas9 Mediated Inheritance of Independently Targeted Alleles in Tobacco α-1,3-Fucosyltransferase 1 and β-1,2-Xylosyltransferase 1 Loci
Source: MDPI journal article supplement (doi:10.3390/ijms23052450), 2022-02-23
Supplement: s1 [file s1]

**Table S2.** Primer information used in this study.

| Use                          | Primer name   | Primer sequence information (5'-3')                 |
|------------------------------|---------------|-----------------------------------------------------|
| For Sanger sequencing        | NbFucT1-F     | GTCAAATTCAAACGCACCCA                                |
|                              | NbFucT1-R     | ATCCCTCGAATAAGCCACAG                                |
|                              | NbXylT1-F     | GAACGTTGTTTAACCCTCTG                                |
|                              | NbXylT1-R     | ATATCGTCCGGATTTCATTCG                               |
| For targeted deep sequencing | NbFucT1-1st-F | ATGAGATCGGCGTCAAATTCAAACG                           |
|                              | NbFucT1-1st-R | ATCCCTCGAATAAGCCACAGAATC                            |
|                              | NbFucT1-2nd-F | ACACTCTTCCCTACACGACGCTCTTCCGATCTCAAACGCACCCAATAAGCA |
|                              | NbFucT1-2nd-R | GTGACTGGAGTTCAGACGTGTGCTCTTCCGATCTTGATAAAACGATTGGGC |
|                              | NbXylT1-1st-F | GAACGTTGTTTAACCCTCTGTAGTC                           |
|                              | NbXylT1-1st-R | ATATCGTCCGGATTTCATTCGTATTGC                         |
|                              | NbXylT1-2nd-F | ACACTCTTCCCTACACGACGCTCTTCCGATCTTCGCTCTCAACTCAATC   |
|                              | NbXylT1-2nd-R | GTGACTGGAGTTCAGACGTGTGCTCTTCCGATCTTGGAATATTGAG      |
| Cas9 detection               | Cas9-F        | CCCACCATCTACCATCTGCG                                |
|                              | Cas9-R        | ATGTCCTCGTTCTCCTCGTTGT                              |
